# Supplementary figures and images for: High mTOR activity is a hallmark of reactive natural killer cells and amplifies early signaling through activating receptors
Source: eLife journal article supplement (doi:10.7554/elife.26423), 2017-08-30

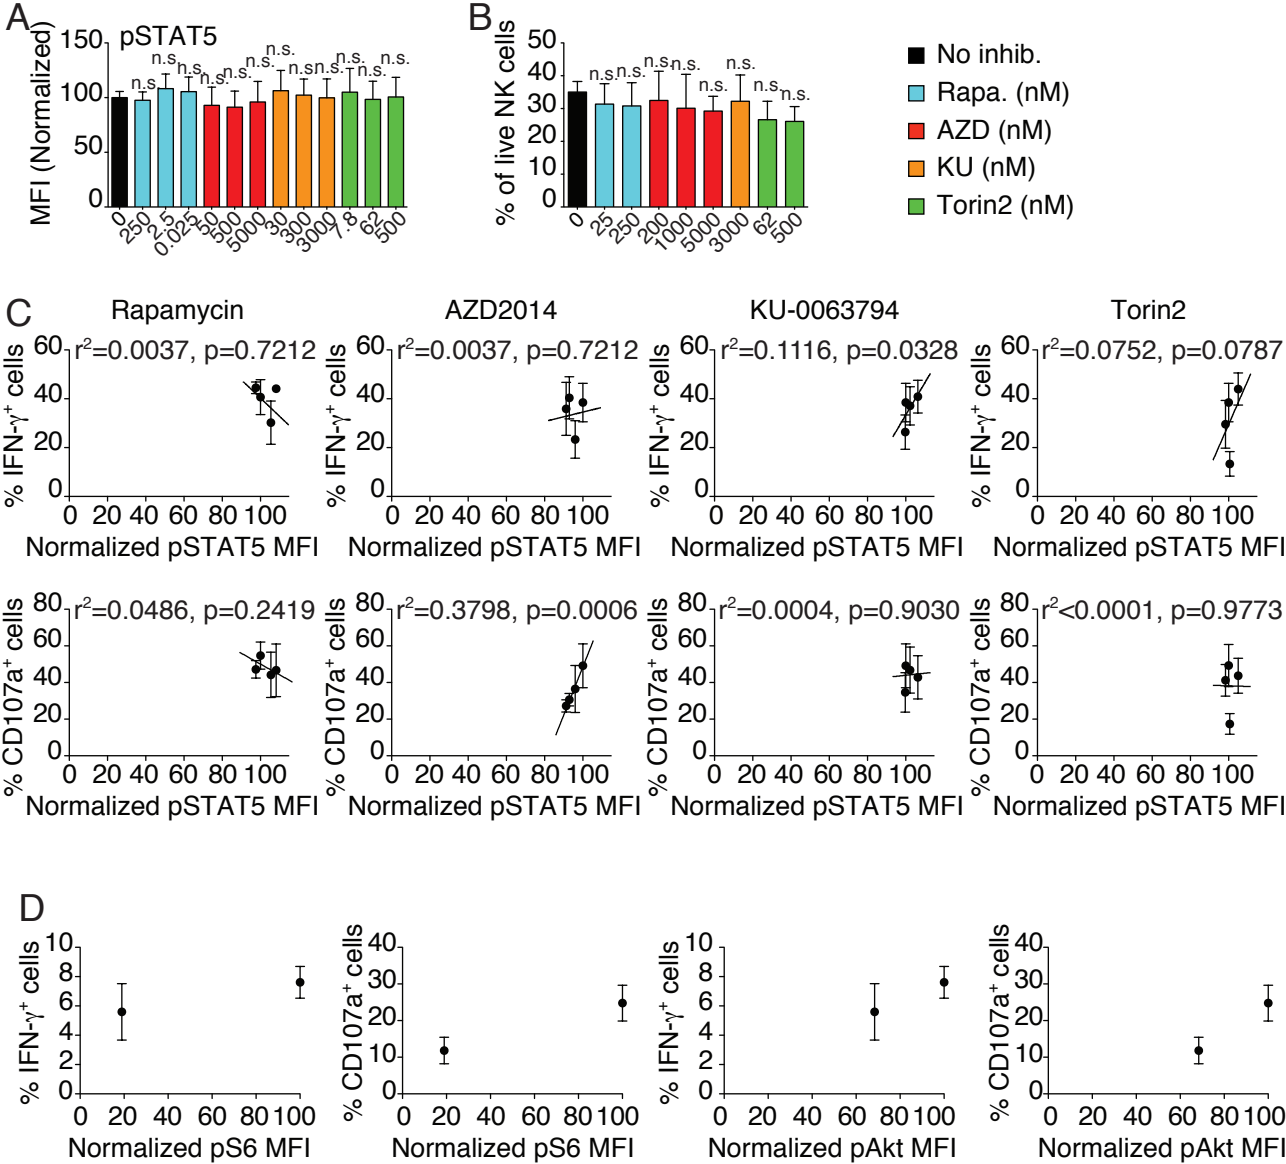

Supplement: supp [file elife-26423-supp-v1.zip]

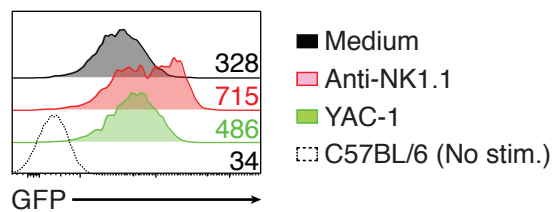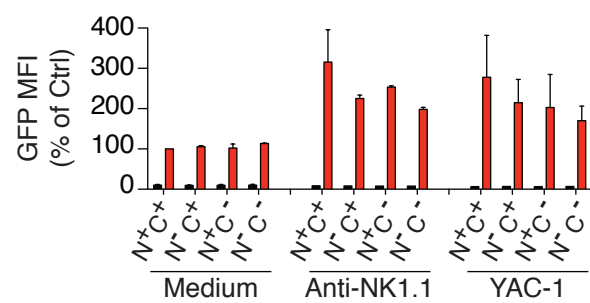

Supplement: supp [file elife-26423-supp-v1.zip]

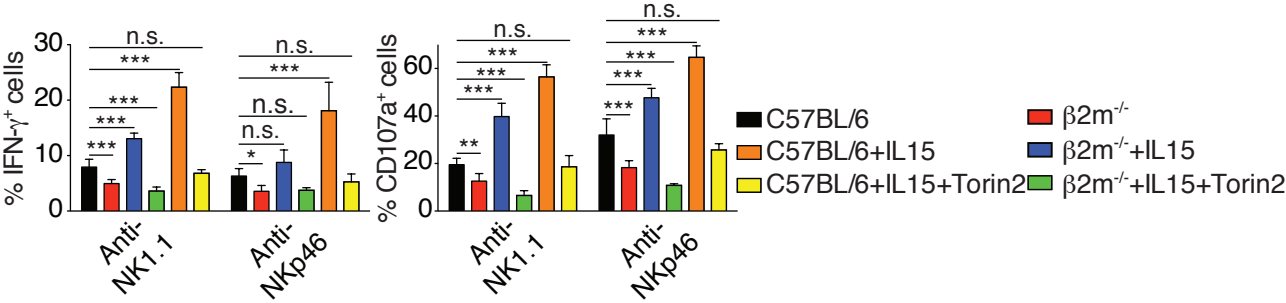

Supplement: supp [file elife-26423-supp-v1.zip]

■ C57BL/6 ■  $\beta 2m^{-/-}$  ■ C57BL/6+Torin2 ■  $\beta 2m^{-/-}$ +Torin2

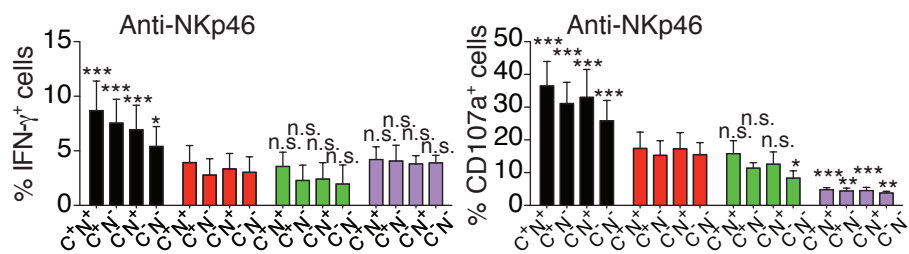

Supplement: supp [file elife-26423-supp-v1.zip]

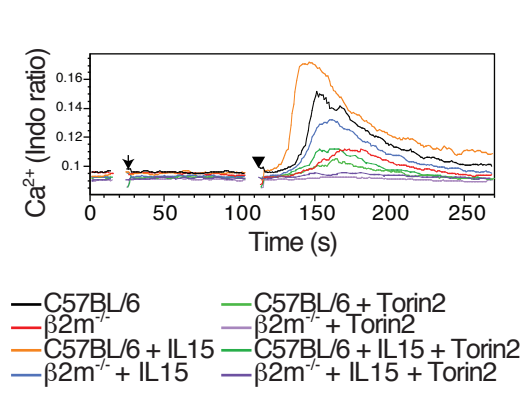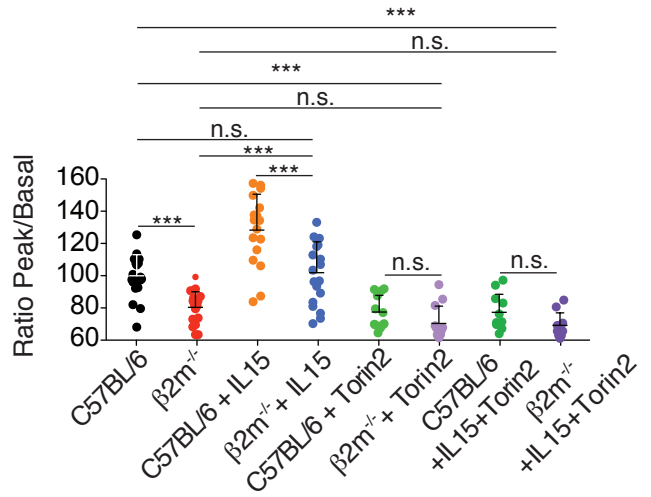

Supplement: supp [file elife-26423-supp-v1.zip]

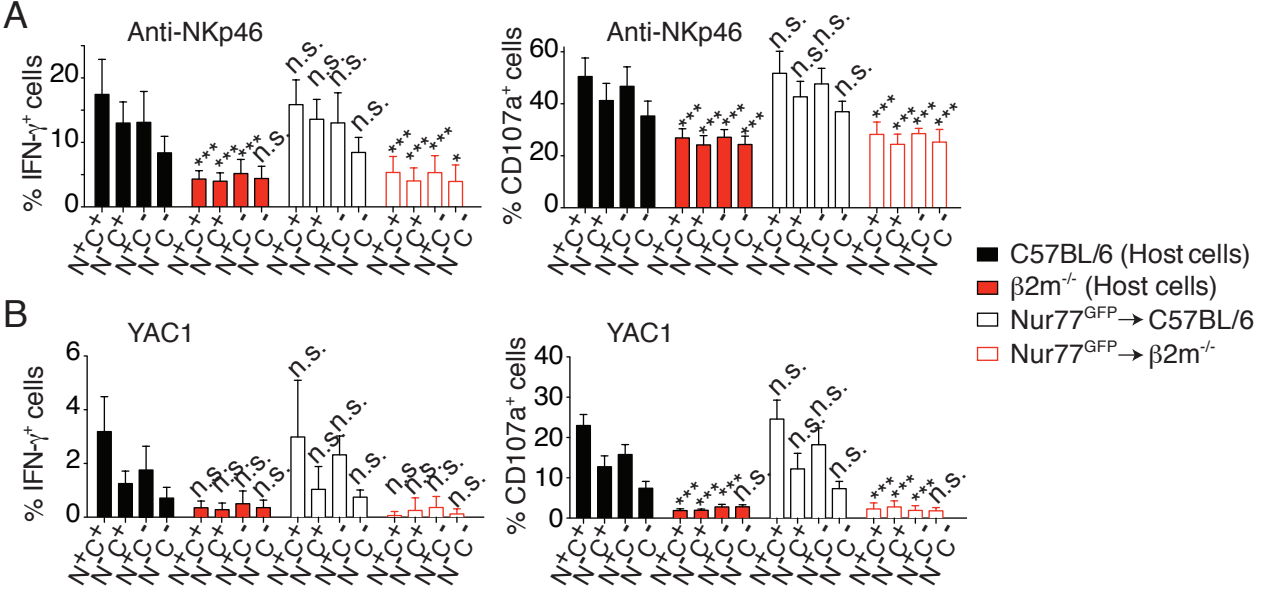

Supplement: supp [file elife-26423-supp-v1.zip]

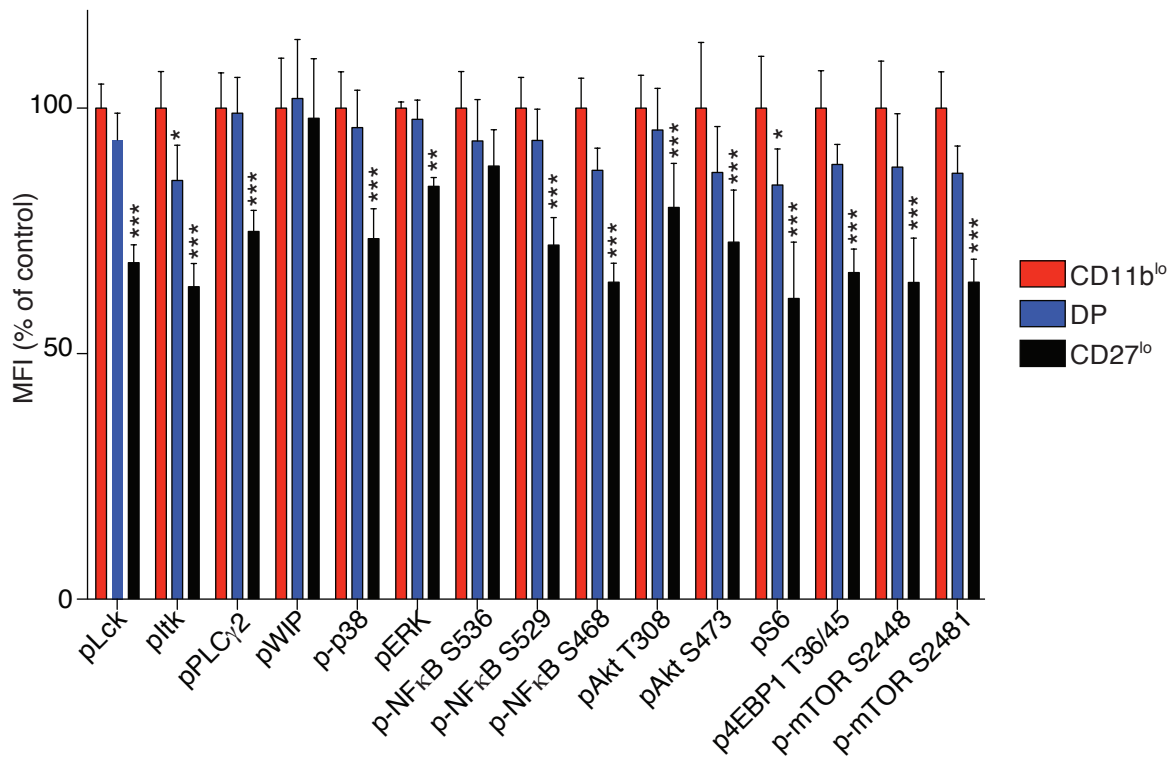

Supplement: supp [file elife-26423-supp-v1.zip]

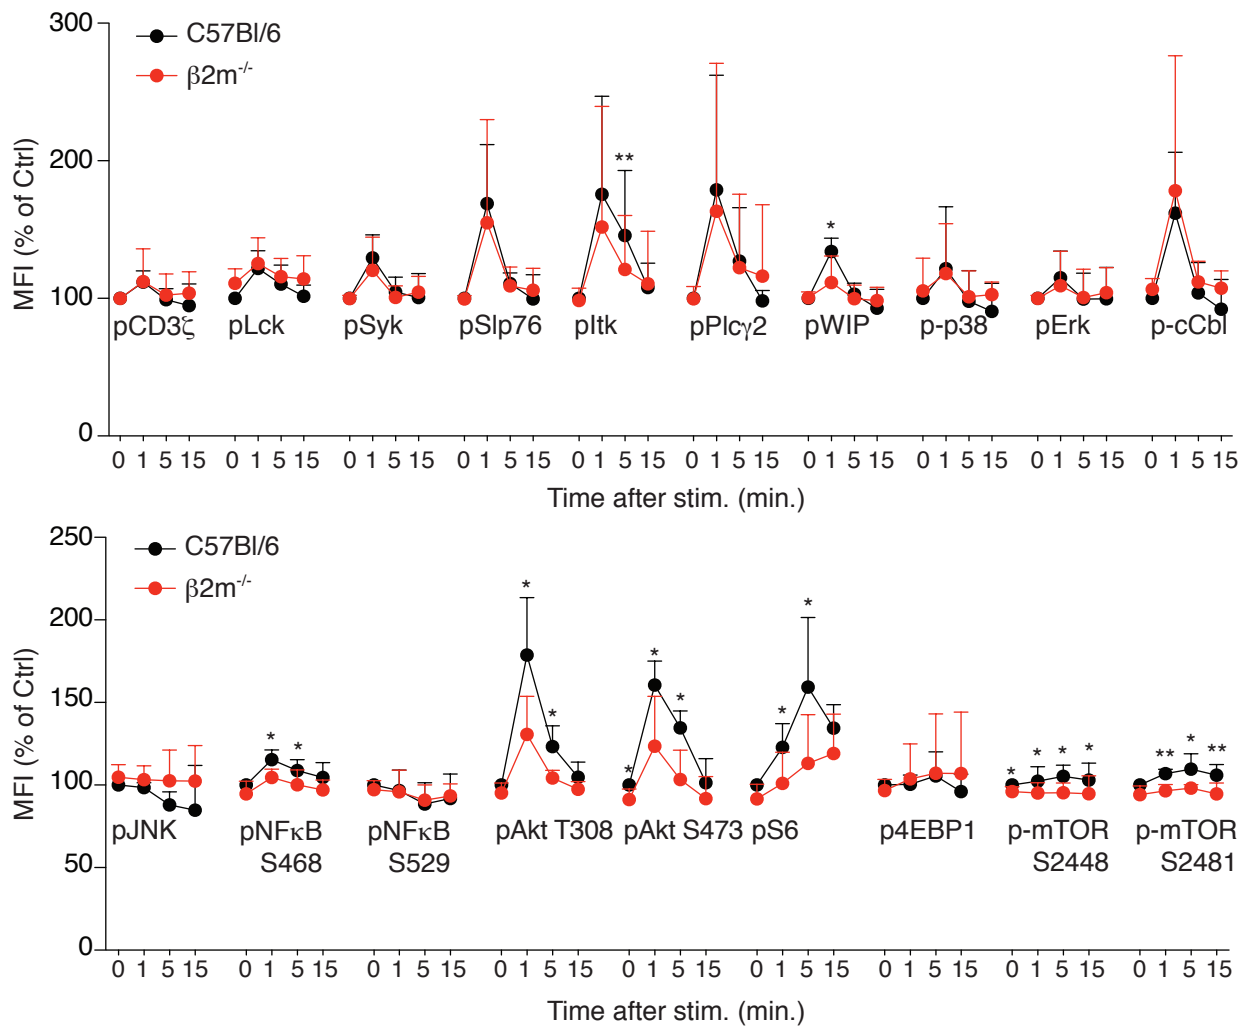

Supplement: supp [file elife-26423-supp-v1.zip]

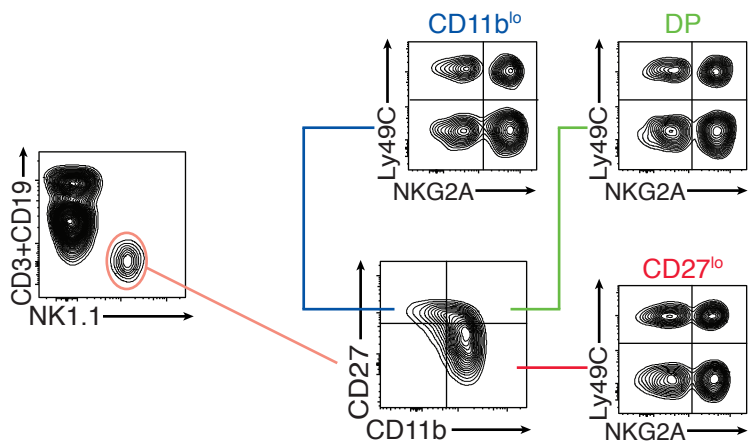

Supplement: supp [file elife-26423-supp-v1.zip]
